# Supplementary material for: Sex chromosome evolution mediated by a large inversion and a possible switch of the sex determination gene
Source: Genome Biol. 2026 Mar 19;27:120. doi: 10.1186/s13059-026-04038-6 (PMC13064059; doi:10.1186/s13059-026-04038-6)
Supplement: Supplementary file 6 — Additional file 6: Dataset S3. Blast result of ARR17 gene in 10 genome assemblies of Salix species. [file 13059_2026_4038_MOESM6_ESM.xlsx]

## Sheet: Sheet2
Assembly	qseqid	sseqid	pident	length	mismatch	gapopen	qstart	qend	sstart	send	evalue	bitscore	RR gene
sher.h1	Potri.019G133600.4.p	h1_chr19+_g30473.t1	91.912	136	11	0	12	147	14	149	1.12e-93	268	ARR17
sher.h1	Potri.019G133600.4.p	h1_chr19-_g30474.t1	90.441	136	10	1	12	147	14	146	6.98e-90	258	ARR17
sher.h1	Potri.019G133600.4.p	h1_chr15-_g23512.t1	69.173	133	39	1	15	145	10	142	4.03e-65	195	ARR16
sher.h1	Potri.019G133600.4.p	h1_chr15-_g23480.t1	69.173	133	39	1	15	145	10	142	4.03e-65	195	ARR16
sher.h1	Potri.019G133600.4.p	h1_chr19+_g30633.t1	69.173	133	39	1	15	145	15	147	1.08e-64	194	ARR16
sher.h1	Potri.019G133600.4.p	h1_chr13+_g21590.t1	66.667	78	20	1	52	129	76	147	1.48e-27	100	other RR genes
sher.h1	Potri.019G133600.4.p	h1_chr03+_g5840.t1	60.870	138	44	2	20	147	14	151	1.33e-55	173	other RR genes
sher.h1	Potri.019G133600.4.p	h1_chr15+_g23855.t1	60.156	128	48	2	17	142	32	158	3.90e-51	160	other RR genes
sher.h2	Potri.019G133600.4.p	h2_chr19-_g30346.t1	92.647	136	10	0	12	147	14	149	2.00e-94	270	ARR17
sher.h2	Potri.019G133600.4.p	h2_chr19+_g30345.t1	92.647	136	10	0	12	147	14	149	3.00e-94	269	ARR17
sher.h2	Potri.019G133600.4.p	h2_chr19+_g30506.t1	69.173	133	39	1	15	145	15	147	2.38e-65	196	ARR16
sher.h2	Potri.019G133600.4.p	h2_chr13+_g21631.t1	66.667	78	20	1	52	129	35	106	3.91e-28	100	other RR genes
sher.h2	Potri.019G133600.4.p	h2_chr15-_g23936.t1	64.062	128	43	2	17	142	32	158	3.55e-55	172	other RR genes
sher.h2	Potri.019G133600.4.p	h2_chr03+_g5729.t1	60.870	138	44	2	20	147	14	151	1.23e-55	173	other RR genes
sarb.b	Potri.019G133600.4.p	Saarb19bG0040300.1	98.551	69	1	0	82	150	1	69	2.78e-45	144	ARR17
sarb.b	Potri.019G133600.4.p	Saarb19bG0040200.1	98.551	69	1	0	82	150	1	69	2.78e-45	144	ARR17
sarb.a	Potri.019G133600.4.p	Saarb19aG0041400.1	98.551	69	1	0	82	150	1	69	2.78e-45	144	ARR17
sarb.a	Potri.019G133600.4.p	Saarb19aG0041300.1	98.551	69	1	0	82	150	1	69	2.78e-45	144	ARR17
sarb.a	Potri.019G133600.4.p	Saarb19aG0094800.2	71.028	107	29	1	15	119	15	121	2.37e-50	158	ARR16
sarb.b	Potri.019G133600.4.p	Saarb19bG0104400.1	69.173	133	39	1	15	145	10	142	2.20e-64	194	ARR16
sarb.a	Potri.019G133600.4.p	Saarb19aG0094800.1	69.173	133	39	1	15	145	15	147	3.33e-64	194	ARR16
sarb.b	Potri.019G133600.4.p	Saarb15bG0059300.1	64.844	128	42	2	17	142	32	158	3.69e-55	174	other RR genes
sarb.a	Potri.019G133600.4.p	Saarb15aG0077300.1	64.062	128	43	2	17	142	32	158	1.44e-54	172	other RR genes
sarb.b	Potri.019G133600.4.p	Saarb03bG0148700.1	60.145	138	45	2	20	147	14	151	4.79e-55	173	other RR genes
sarb.a	Potri.019G133600.4.p	Saarb03aG0148200.1	60.145	138	45	2	20	147	14	151	4.79e-55	173	other RR genes
sbra	Potri.019G133600.4.p	KAB5512328.1	94.118	136	8	0	12	147	14	149	1.09e-95	273	ARR17
sbra	Potri.019G133600.4.p	KAB5512329.1	92.647	136	10	0	12	147	14	149	7.37e-94	268	ARR17
sbra	Potri.019G133600.4.p	KAB5524738.1	91.429	140	12	0	11	150	13	152	4.87e-96	274	ARR17
sbra	Potri.019G133600.4.p	KAB5512405.1	69.925	133	38	1	15	145	15	147	4.73e-65	195	ARR16
sbra	Potri.019G133600.4.p	KAB5530241.1	64.103	78	22	1	52	129	464	535	1.20e-24	98.2	other RR genes
sbra	Potri.019G133600.4.p	KAB5524910.1	64.062	128	43	2	17	142	32	158	3.69e-55	172	other RR genes
sbra	Potri.019G133600.4.p	KAB5524669.1	63.281	128	44	2	17	142	32	158	7.31e-56	172	other RR genes
sbra	Potri.019G133600.4.p	KAB5565049.1	60.870	138	44	2	20	147	14	151	1.03e-55	173	other RR genes
sdun	Potri.019G133600.4.p	KAF9661321.1	92.143	140	11	0	11	150	16	155	3.91e-97	276	ARR17
sdun	Potri.019G133600.4.p	KAF9661318.1	92.143	140	11	0	11	150	16	155	3.91e-97	276	ARR17
sdun	Potri.019G133600.4.p	KAF9661429.1	64.626	147	50	1	1	145	1	147	4.72e-65	195	other RR genes
sdun	Potri.019G133600.4.p	KAF9667807.1	63.281	128	44	2	17	142	32	158	1.30e-54	171	other RR genes
skor	Potri.019G133600.4.p	Sakor.KAJ6762285.1	70.400	125	35	1	23	145	7	131	3.71e-61	184	ARR16
skor	Potri.019G133600.4.p	Sakor.KAJ6688096.1	62.121	132	47	2	13	142	28	158	3.23e-55	172	other RR genes
skor	Potri.019G133600.4.p	Sakor.KAJ6694780.1	60.870	138	44	2	20	147	14	151	1.15e-55	173	other RR genes
spur	Potri.019G133600.4.p	Sapur.15WG074000.1.p	94.697	132	7	0	16	147	18	149	4.08e-92	265	ARR17
spur	Potri.019G133600.4.p	Sapur.15WG073500.1.p	94.697	132	7	0	16	147	18	149	4.08e-92	265	ARR17
spur	Potri.019G133600.4.p	Sapur.15WG075200.1.p	94.697	132	7	0	16	147	18	149	4.08e-92	265	ARR17
spur	Potri.019G133600.4.p	Sapur.15WG073900.1.p	94.231	104	6	0	16	119	18	121	7.37e-70	207	ARR17
spur	Potri.019G133600.4.p	Sapur.019G055200.1.p	92.593	108	8	0	40	147	4	111	8.59e-72	212	ARR17
spur	Potri.019G133600.4.p	Sapur.019G055300.1.p	90.244	123	11	1	12	133	14	136	6.53e-81	235	ARR17
spur	Potri.019G133600.4.p	Sapur.019G062000.1.p	69.173	133	39	1	15	145	15	147	2.24e-64	194	ARR16
spur	Potri.019G133600.4.p	Sapur.15WG088900.1.p	64.800	125	41	2	20	142	35	158	1.22e-54	171	other RR genes
spur	Potri.019G133600.4.p	Sapur.15ZG071500.1.p	64.800	125	41	2	20	142	35	158	1.22e-54	171	other RR genes
spur	Potri.019G133600.4.p	Sapur.15WG056100.2.p	61.719	128	46	2	17	142	27	153	1.01e-53	167	other RR genes
spur	Potri.019G133600.4.p	Sapur.15WG056100.1.p	61.719	128	46	2	17	142	48	174	7.83e-53	166	other RR genes
spur	Potri.019G133600.4.p	Sapur.003G153000.1.p	60.870	138	44	2	20	147	14	151	3.00e-55	173	other RR genes
ssuc	Potri.019G133600.4.p	KAJ6293821.1	94.697	132	7	0	16	147	18	149	2.10e-92	265	ARR17
ssuc	Potri.019G133600.4.p	KAJ6291767.1	71.028	107	29	1	15	119	15	121	3.24e-50	157	ARR16
ssuc	Potri.019G133600.4.p	KAJ6370121.1	63.281	128	44	2	17	142	32	158	7.68e-56	172	other RR genes
ssuc	Potri.019G133600.4.p	KAJ6293989.1	62.121	132	47	2	13	142	23	153	3.25e-55	172	other RR genes
ssuc	Potri.019G133600.4.p	KAJ6346756.1	60.870	138	44	2	20	147	14	151	1.13e-55	173	other RR genes
ssuc_m	Potri.019G133600.4.p	KAJ6297107.1	69.173	133	39	1	15	145	15	147	1.04e-64	194	ARR16
ssuc_m	Potri.019G133600.4.p	KAJ6374208.1	62.121	132	47	2	13	142	23	153	3.79e-55	172	other RR genes
ssuc_m	Potri.019G133600.4.p	KAJ6326045.1	60.870	138	44	2	20	147	14	151	2.14e-55	173	other RR genes

## Sheet: Caption
Supplementary Data 3. Blast result of ARR17 gene in 10 genome assemblies of Salix species using ‘Potri.019G133600.4.p’ as query. Query and subject sequence ID, percentage of identical positions, alignment length, the number of mismatchs, gaps, start and end position of alignment in query and subject sequences, expect value, bit score and putative RR gene name are given.
